# Supplementary material for: Anatase TiO2 with nanopores for dye-sensitized solar cells
Source: Royal Society of Chemistry journal article supplement (doi:10.1039/c4cp02522a), 2014-01-01
Supplement: c4cp02522a1.pdf [file c4cp02522a1.pdf]

## Supporting Information

### Anatase TiO<sub>2</sub> with Nanopores for Dye-sensitized Solar Cells

*Shuang Yang, Yi Chu Zheng, Yu Hou, Xiaohua Yang and Hua gui Yang\**

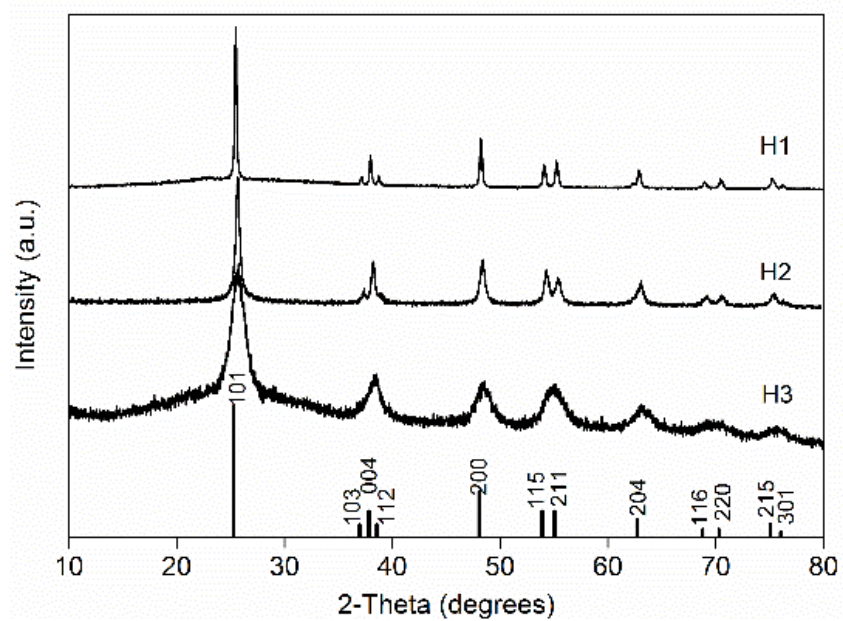

**Figure S1.** X-ray diffraction patterns of the porous anatase TiO<sub>2</sub>.

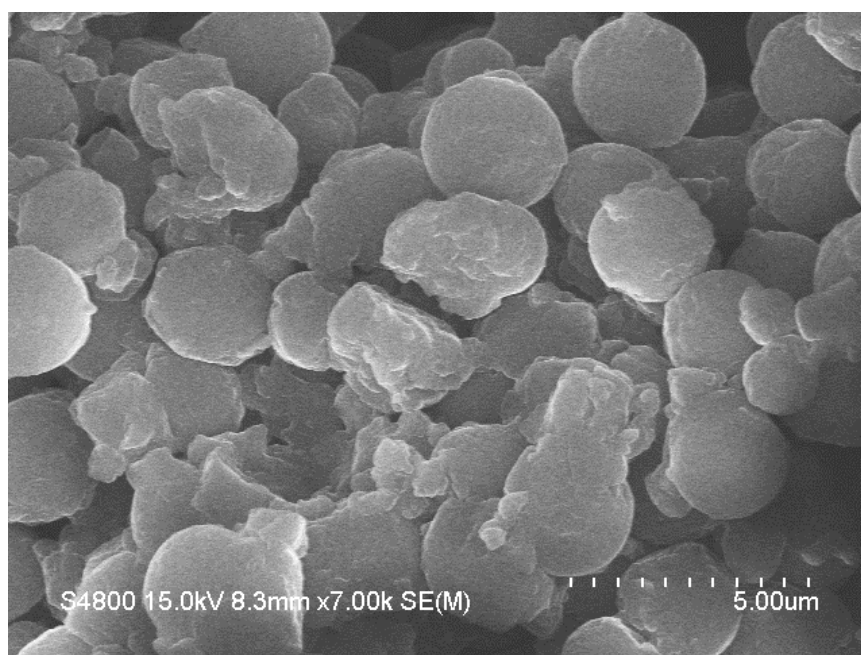

**Figure S2.** SEM image of the TiO<sub>2</sub> crystals synthesized with oleic acid.

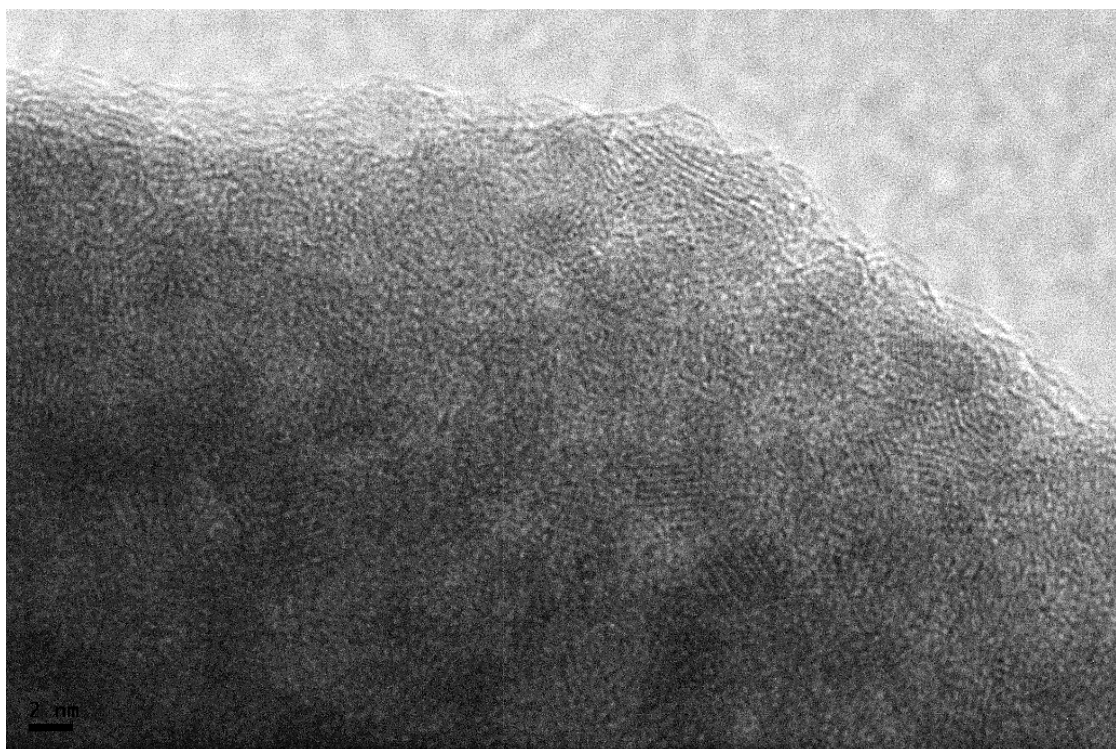

**Figure S3.** HRTEM image of the TiO<sub>2</sub> crystals synthesized with oleic acid.

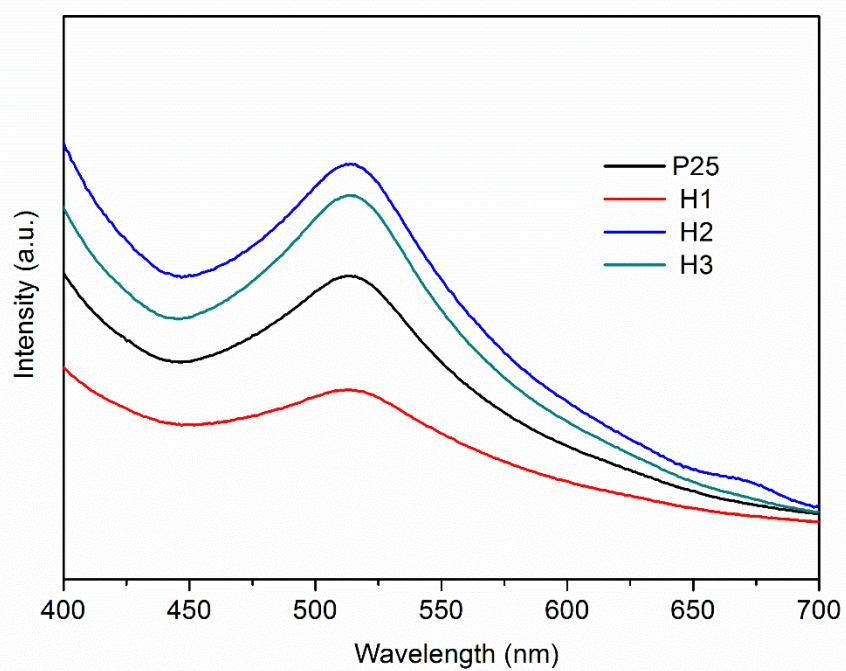

**Figure S4.** UV-vis absorption spectrum of N719 dye absorption on TiO<sub>2</sub> films.

**A. Porous crystals**

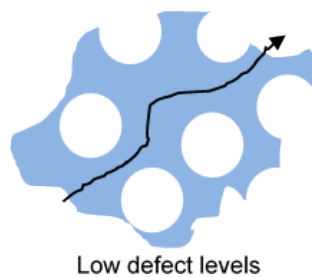

**B. Nanoparticles**

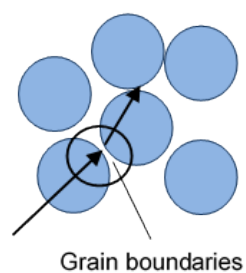

Figure S5. Schematic illustrations of electron path ways in porous crystals and conventional nanoparticles.
